# Supplementary material
Source: ML conference proceedings conference paper supplement (https://aclanthology.org/P17-1143)
Supplement: Notes [file AnnotationGuidelines_V2.01.pdf › supplementary/AnnotationGuidelines_V2.01.pdf]

# Guidelines to Annotating Malware Reports With BRAT V2.01

## Contents

|          |                                        |          |
|----------|----------------------------------------|----------|
| <b>1</b> | <b>Introduction</b>                    | <b>1</b> |
| <b>2</b> | <b>Details</b>                         | <b>2</b> |
| 2.1      | STEP 1 - Label Terms . . . . .         | 2        |
| 2.1.1    | What to label . . . . .                | 2        |
| 2.1.2    | What are the Term Labels . . . . .     | 2        |
| 2.2      | STEP 2 - Label Relations . . . . .     | 4        |
| 2.2.1    | What are the Relation Labels . . . . . | 4        |
| 2.3      | STEP 3 - Label Attributes . . . . .    | 6        |

# 1 Introduction

There are 3 main steps to annotating APT reports with BRAT.

## 1. Label Terms

This refers to labelling word-phrases with Term labels, such as Subject, Object, Action, Modifier.

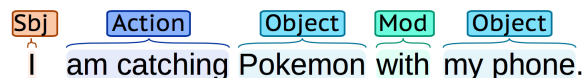

Figure 1: Example of Term labels: Subject (Sbj), Object (Obj), Action (Act) and Modifier (Mod)

## 2. Label Relations

This refers to labelling links between pairs of Term labels.

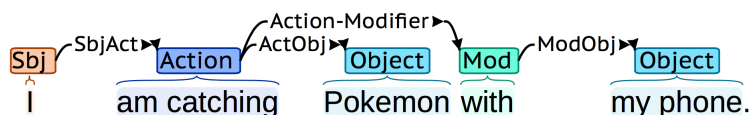

Figure 2: Example of Relation labels

## 3. Label Attributes

This refers to labelling Terms (Actions only) with Attribute labels. Note: This can be done in conjunction with Step 1.

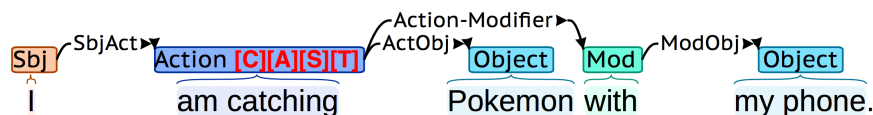

Figure 3: Example of Attribute labels ([C][A][S][T])

## 2 Details

### 2.1 STEP 1 - Label Terms

#### 2.1.1 What to label

First of all, this is done only for sentences relevant to the following:

- Technical Capabilities of the malware
- Technical Activities of the malware

Example of sentence to be annotated:

*Abilities include uploading and downloading files to and from the target, using the file-retrieval tool Wget to download files from the Web to the target.*

As a general guide, the sentence should imply a particular malware action or capability, with reference to the list of attribute labels.

DO NOT label sentences related to the following:

- Geopolitical or commercial effects of the malware
- Investigations into origins of the malware (aka attribution)
- Advertisements for security products

Example of sentence NOT to be annotated:

*North Korea, with a population of 25 million, has an active duty force of 1.19 million personnel, the fourth largest in the world.*

#### 2.1.2 What are the Term Labels

Most sentences that we deal with involve a description of some form of action. Take the following as a simple example.

*I am catching Pokemon with my phone.*

- **Subject**

This is the initiator of the action aka the *do-er*.

In the above case, *I* is the Subject.

As a rule of thumb, in ambiguous cases, try replacing the Subject with the word *it* or *they*. The sentence should still sound correct and retain its original meaning.

For example in the given sentence:

*The RCS sample sent to Ahmed adds a Run registry key.*

*The RCS sample sent to Ahmed* will be tagged as the Subject. Replacing the phrase with *it* gives the following sentence:

*It adds a Run registry key.*

which still sounds correct and retains the original meaning.

- **Object**

This is the recipient of the action aka the *do-ee*.

In the above case, *Pokemon* and *my phone* are the Objects.

The same rule of thumb used in Subject labels applies for Object labels in ambiguous cases.

- **Action**

This is the event.

In the above case, *am catching* is the Action.

Note: label an entire progressive verb phrase as Action, for example, label the entire phrase *am catching*, instead of just *catching*. Other examples include *is opening* and *are carrying*.

- **Modifier**

This refers to words that link to other word-phrases that elaborate on the Action.

In the above case, *with* is the Modifier. Modifiers are typically, but not always, prepositions.

For the sentence above, the following should be the resultant labels.

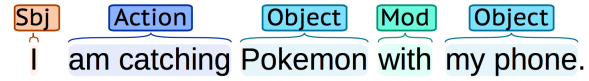

## 2.2 STEP 2 - Label Relations

### 2.2.1 What are the Relation Labels

Essentially we want to connect all the labelled Terms together. Each Term should have at least one Relation, possibly more. Using the below sentence as a simple example.

*I am catching Pokemon with my phone.*

- **SubjAction** - Subject-Action

This connects a Subject to the Action that it is performing.

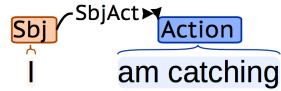

- **ActionObj** - Action-Object

This connects the Action to the Object that it is acting on.

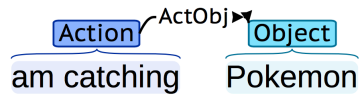

Note: NOT *catch* and *my phone*, since there is a Modifier between these.

- **ActionMod** - Action-Modifier

This connects the Action to the relevant Modifier.

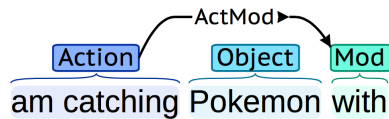

- **ModObj** - Modifier-Object

This connects the Modifier to the relevant Object.

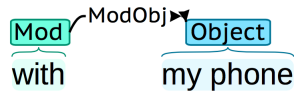

For the above sentence, the following should be the resultant labels.

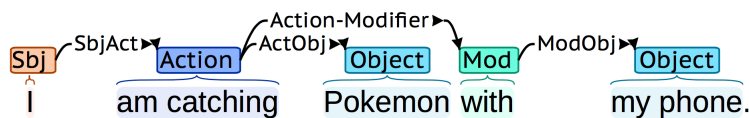

## 2.3 STEP 3 - Label Attributes

This is the hard part.

Attributes are labelled for Actions.

Essentially we want to assign the Action to a Technical Classification under the Malware Attribute Enumeration and Characterization (MAEC) vocabulary. See [https://maec.mitre.org/language/version4.1/MAEC\\_Vocabs\\_Spec\\_v1\\_1.pdf](https://maec.mitre.org/language/version4.1/MAEC_Vocabs_Spec_v1_1.pdf) for more information on MAEC.

There are four categories of Attribute Labels: ActionName [A], Capability [C], StrategicObjectives [S] and TacticalObjectives [T].

For each Action, try to tag as many relevant Attributes as possible, although in some cases not all four categories may apply.

As a quick example, see the sentence below.

*Stuxnet has the ability to hide copies of its files copied to removable drives.*

This describes Stuxnet's ability to prevent itself from being detected. The Action *hide* should be tagged with the following Attribute Labels:

Table 1: Example of Attribute-Labeling

|                            |                                                       |
|----------------------------|-------------------------------------------------------|
| <b>ActionName</b>          | 032:File-hide_file                                    |
| <b>Capability</b>          | 002:MalwareCapability- <b>anti-detection</b>          |
| <b>StrategicObjectives</b> | 007: <b>AntiDetection</b> -hide_malware_artifacts     |
| <b>TacticalObjectives</b>  | 023: <b>AntiDetection</b> -hide_file_system_artifacts |

\*Note: words in bold should be the same

This is difficult because it requires a certain amount of domain knowledge and there are a huge number of labels.

To make this easier, we have provided AttributeLabels\_V1.01.pdf.

This file contains all the Attribute Labels from the four categories. For each Label, there is an associated Description and a list of possible keywords related to the label. You can then use Ctrl-F or Cmd-F to quickly search through the labels.
